# Supplementary figures and images for: Constructing stable covalent bonding in black phosphorus/reduced graphene oxide for lithium ion battery anodes
Source: Royal Society of Chemistry journal article supplement (doi:10.1039/d0cc03698f), 2020-01-01

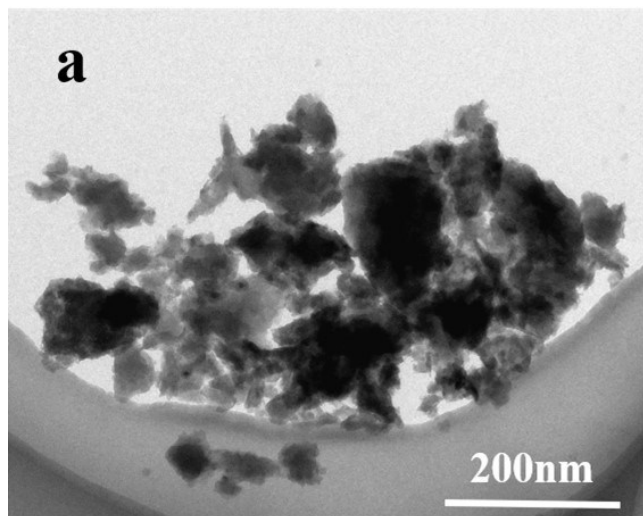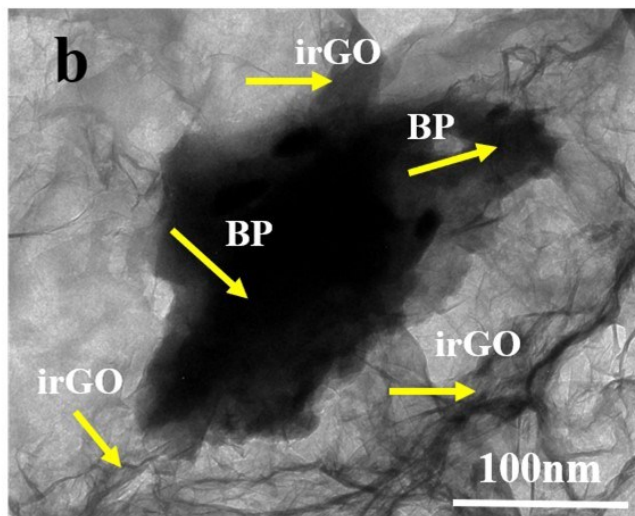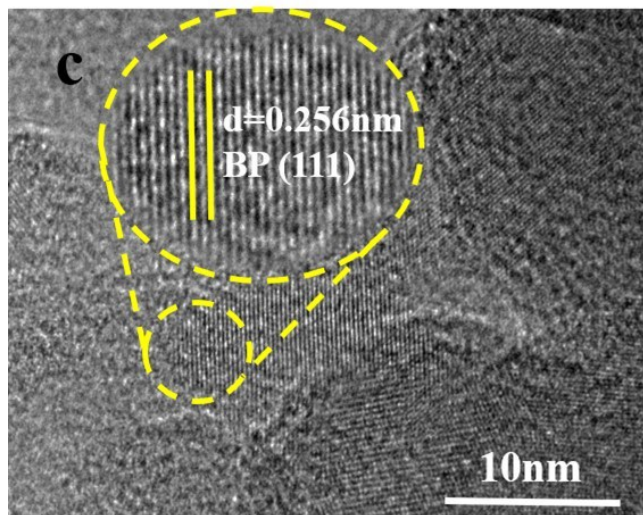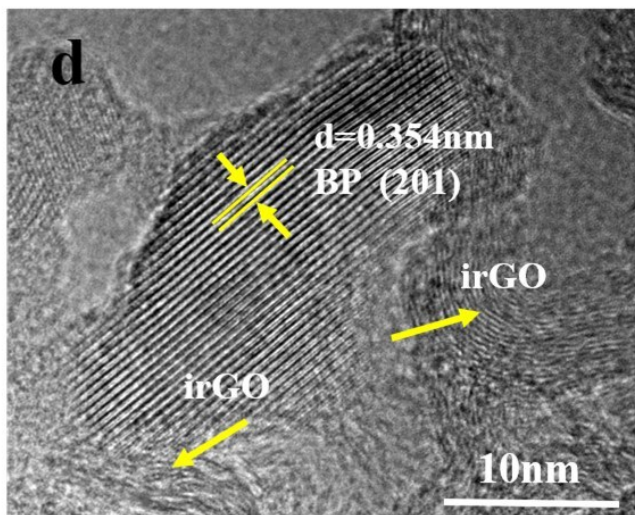

Supplement: d0cc03698f3.pdf [file d0cc03698f3.pdf]

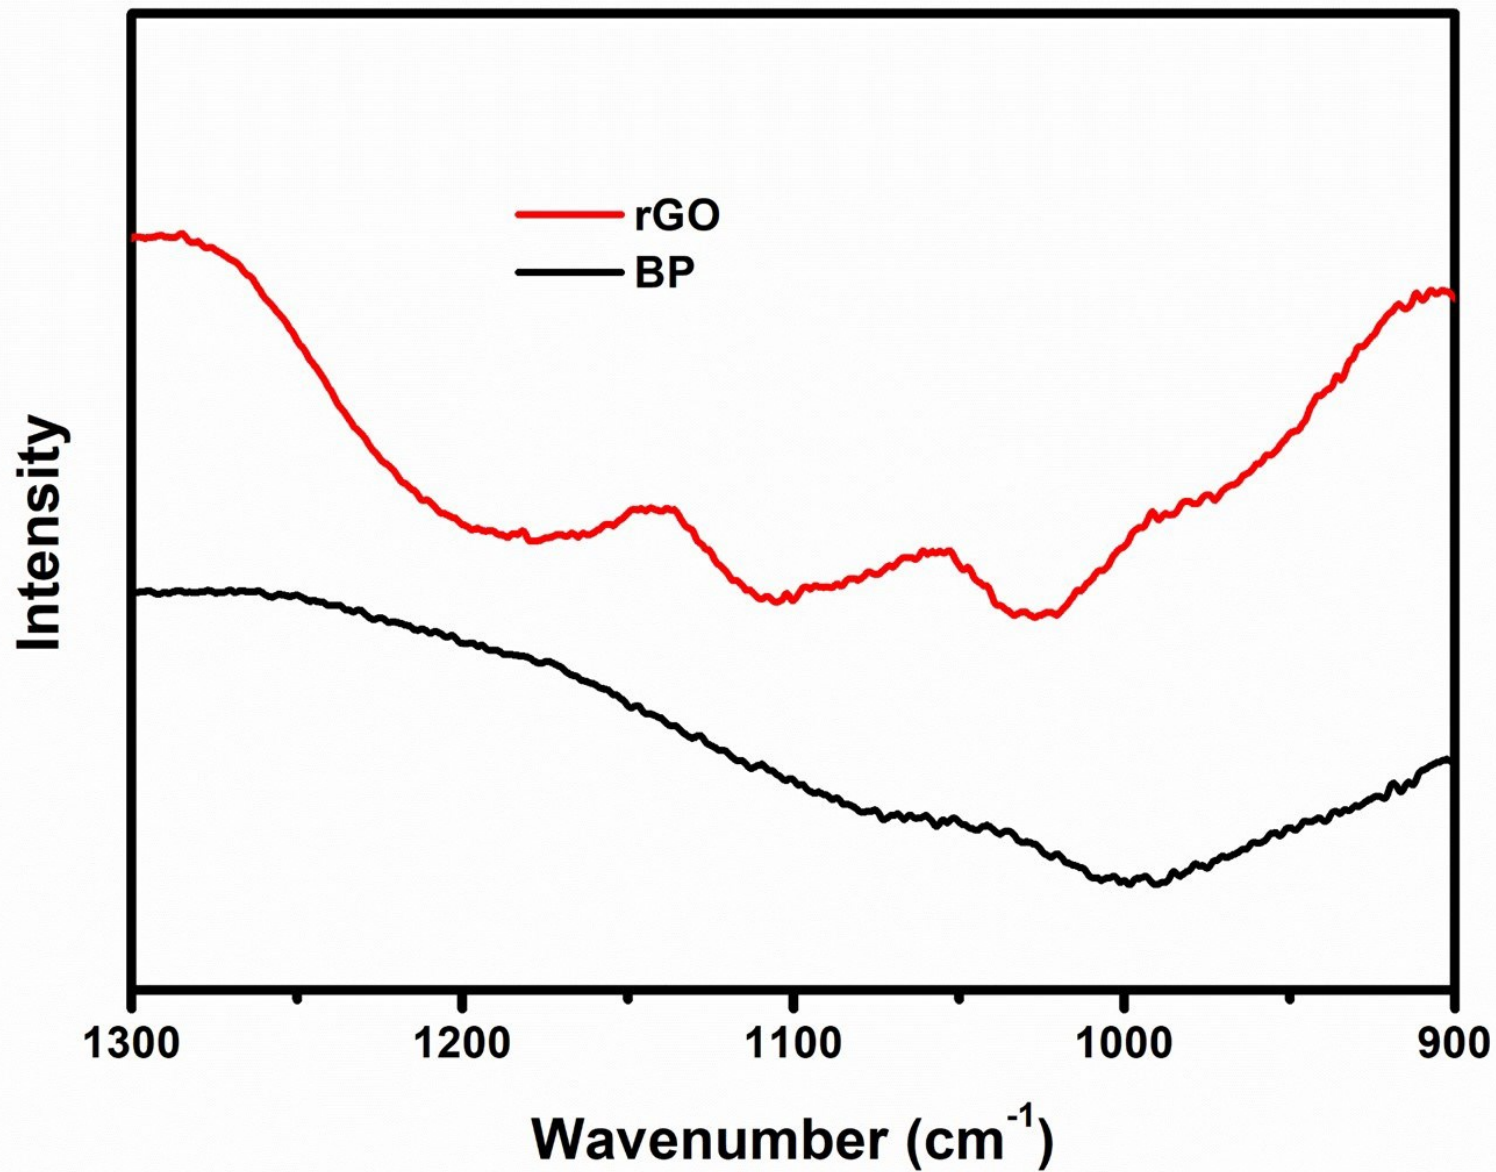

Supplement: d0cc03698f4.pdf [file d0cc03698f4.pdf]

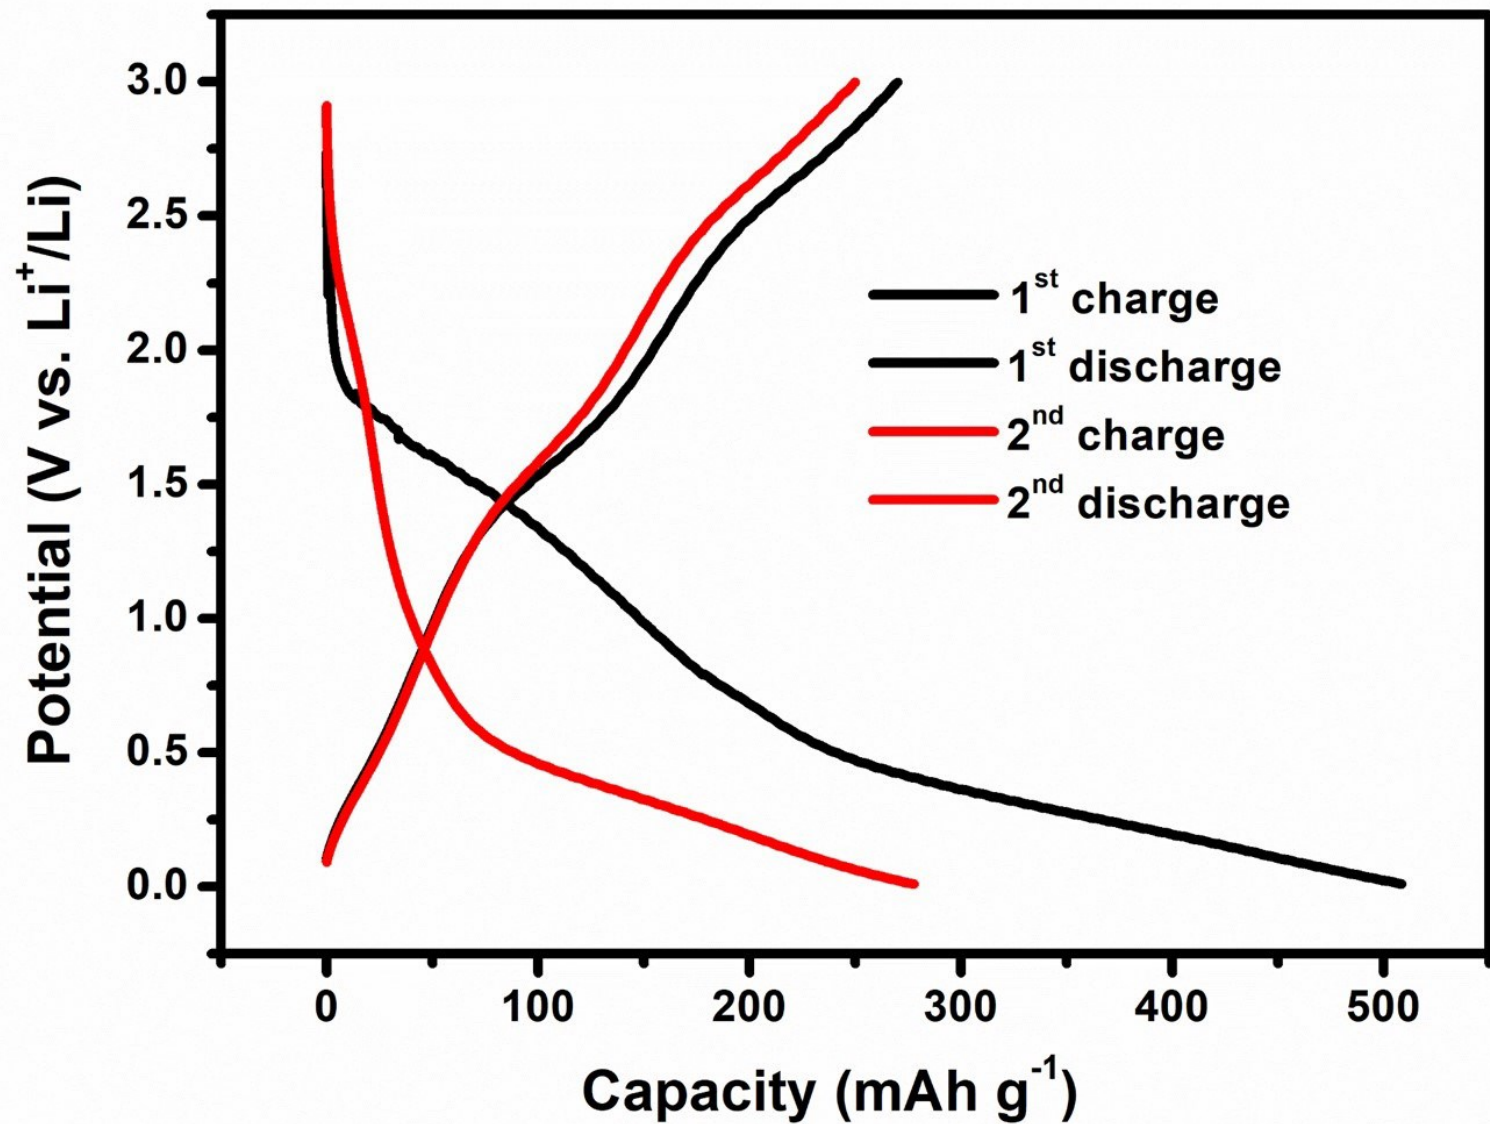

Supplement: d0cc03698f5.pdf [file d0cc03698f5.pdf]

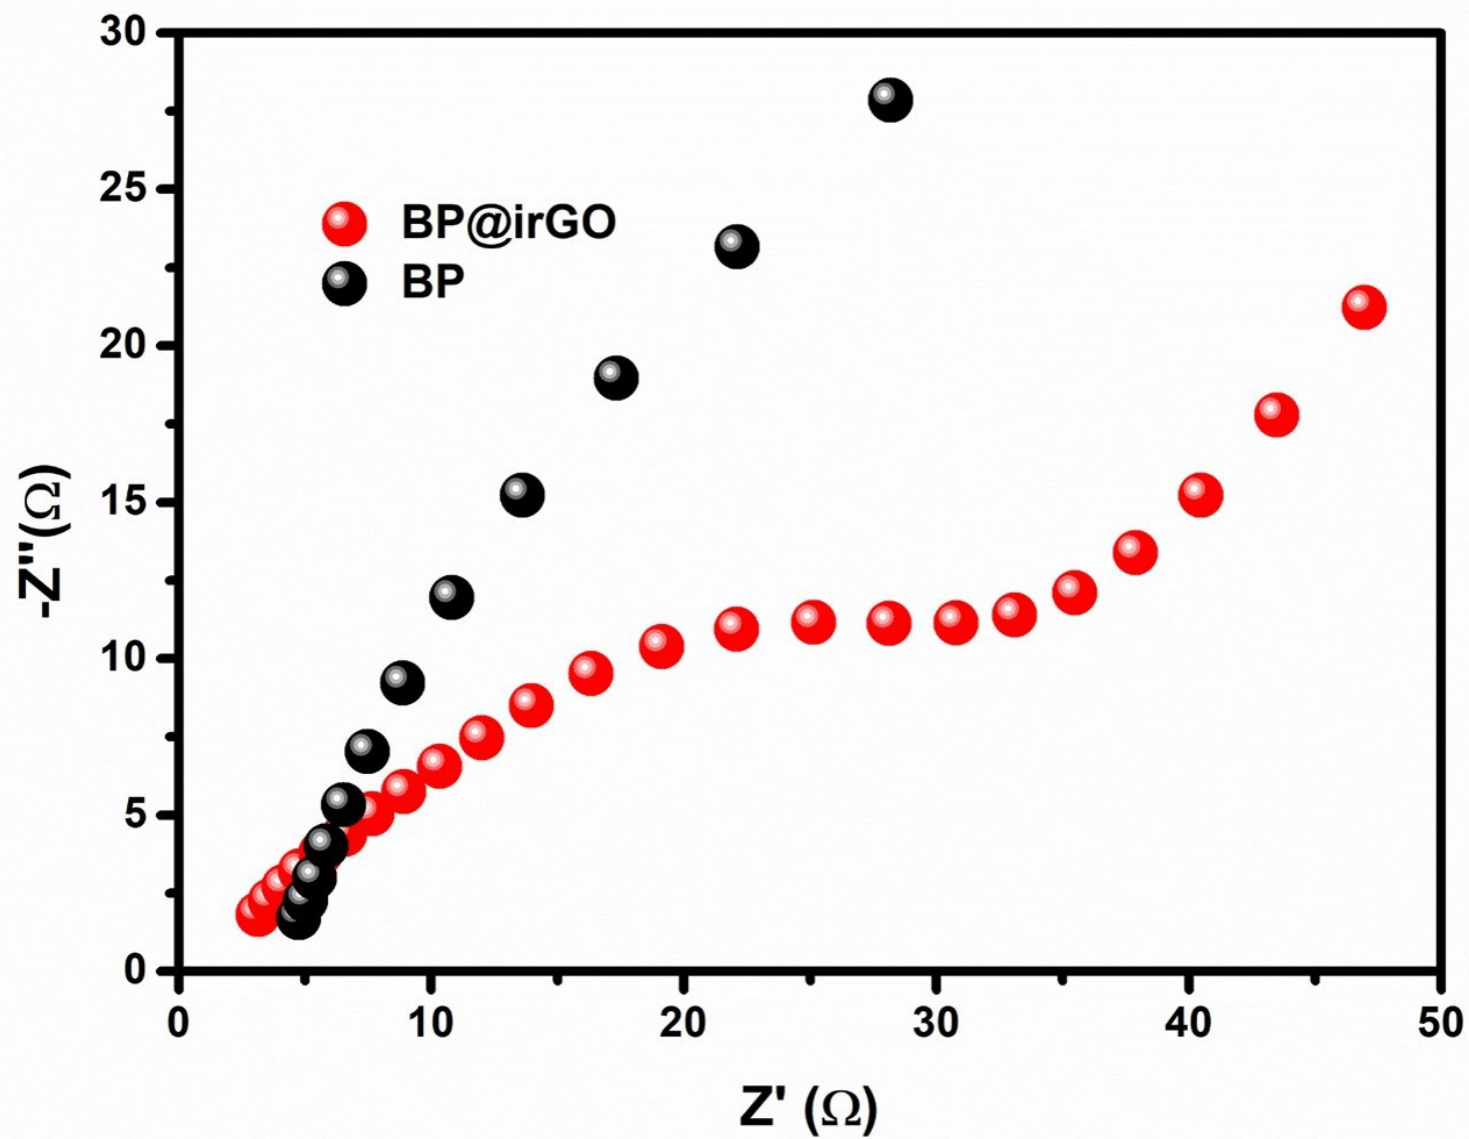

Supplement: d0cc03698f6.pdf [file d0cc03698f6.pdf]
